# Supplementary material for: Left Atrial Functional Remodeling in Patients with Chronic Heart Failure Treated with Sacubitril/Valsartan
Source: MDPI journal article supplement (doi:10.3390/jcm12031086), 2023-01-30
Supplement: s1 [file s1]

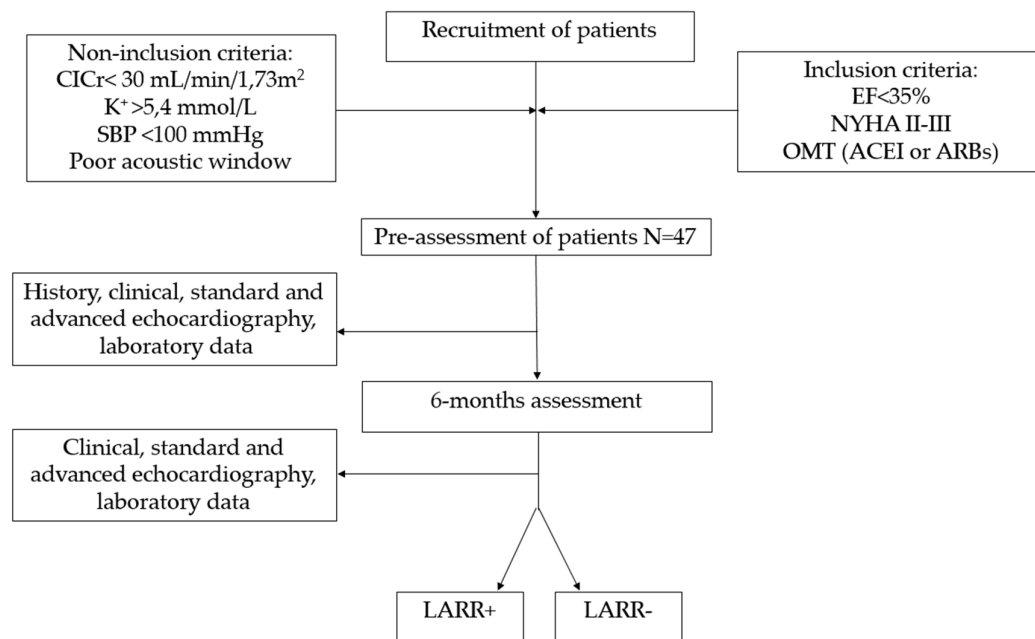

**Figure S1.** Study flow chart.

LVEF: left ventricular ejection fraction; NYHA: New York Heart Association; SBP: systolic blood pressure; eGFR: estimated glomerular filtration rate; Ace-i: angiotensin converting enzyme inhibitors; ARBs: angiotensin receptor blockers; CrCl: Creatinine Clearance; K⁺: potassium.

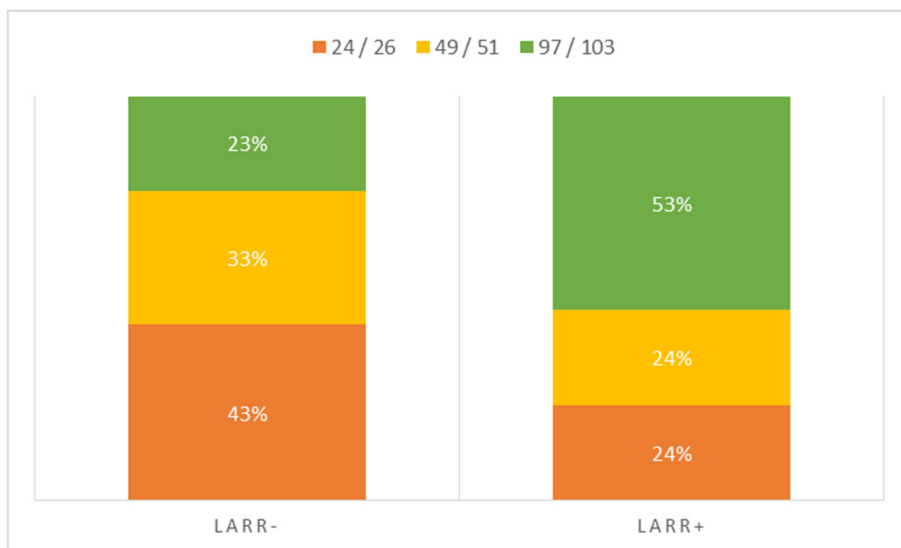

**Figure S2.** Sacubitril Valsartan dosage at 6-month follow up.

**Table S1.** Multivariable regression stepwise analysis with changes in LAVi.

| Changes in LAVi         | Beta    | Std. Err. | b       | Std. Err. | P-value       |
|-------------------------|---------|-----------|---------|-----------|---------------|
| <b>Changes in LVEDV</b> | -0.4292 | 0.1315    | -0.4244 | 0.1300    | <b>0.0024</b> |
| <b>Changes in PALS</b>  | -0.3283 | 0.1290    | -0.1259 | 0.0495    | <b>0.0153</b> |
| <b>Baseline LVEDD</b>   | -0.2361 | 0.1315    | -0.0061 | 0.0034    | 0.0808        |

LVEDV: left ventricular end-diastolic volume; PALS: peak atrial longitudinal strain; LVEDD: left ventricular end-diastolic diameter In bold p value < 0.05.
